# Supplementary material for: Inverted methoxypyridinium phthalocyanines for PDI of pathogenic bacteria
Source: Royal Society of Chemistry journal article supplement (doi:10.1039/c5pp00145e), 2015-07-07
Supplement: c5pp00145e1.pdf [file c5pp00145e1.pdf]

## Supporting Information

### Inverted methoxypyridinium phthalocyanines for PDI of pathogenic bacteria

Leandro M. O. Lourenço,<sup>a</sup> Andreina Sousa,<sup>b</sup> Maria C. Gomes,<sup>a,b</sup> Maria A. F. Faustino,<sup>a</sup> Adelaide Almeida,<sup>b</sup> Artur M. S. Silva,<sup>a</sup> Maria G. P. M. S. Neves,<sup>a</sup> José A. S. Cavaleiro,<sup>a</sup> Ângela Cunha,<sup>b</sup> João P. C. Tomé<sup>a,c\*</sup>

<sup>a</sup>*Department of Chemistry & QOPNA, University of Aveiro, 3810-193 Aveiro, Portugal.*

<sup>b</sup>*Department of Biology and CESAM, University of Aveiro, 3810-193 Aveiro, Portugal.*

<sup>c</sup>*Department of Organic and Macromolecular Chemistry, Ghent University, B-9000 Gent, Belgium.*

#### Contents

|                                                                               |           |
|-------------------------------------------------------------------------------|-----------|
| <b>1 Experimental section.....</b>                                            | <b>2</b>  |
| <b>1.1 NMR spectra of phthalonitrile and phthalocyanine derivatives .....</b> | <b>2</b>  |
| <b>1.2 Mass spectra of phthalonitrile and phthalocyanine derivatives.....</b> | <b>16</b> |
| <b>1.2.1 ESI-MS spectra.....</b>                                              | <b>16</b> |
| <b>1.2.2 ESI-HRMS spectra.....</b>                                            | <b>18</b> |

## 1 Experimental section

### 1.1 NMR spectra of phthalonitrile and phthalocyanine derivatives

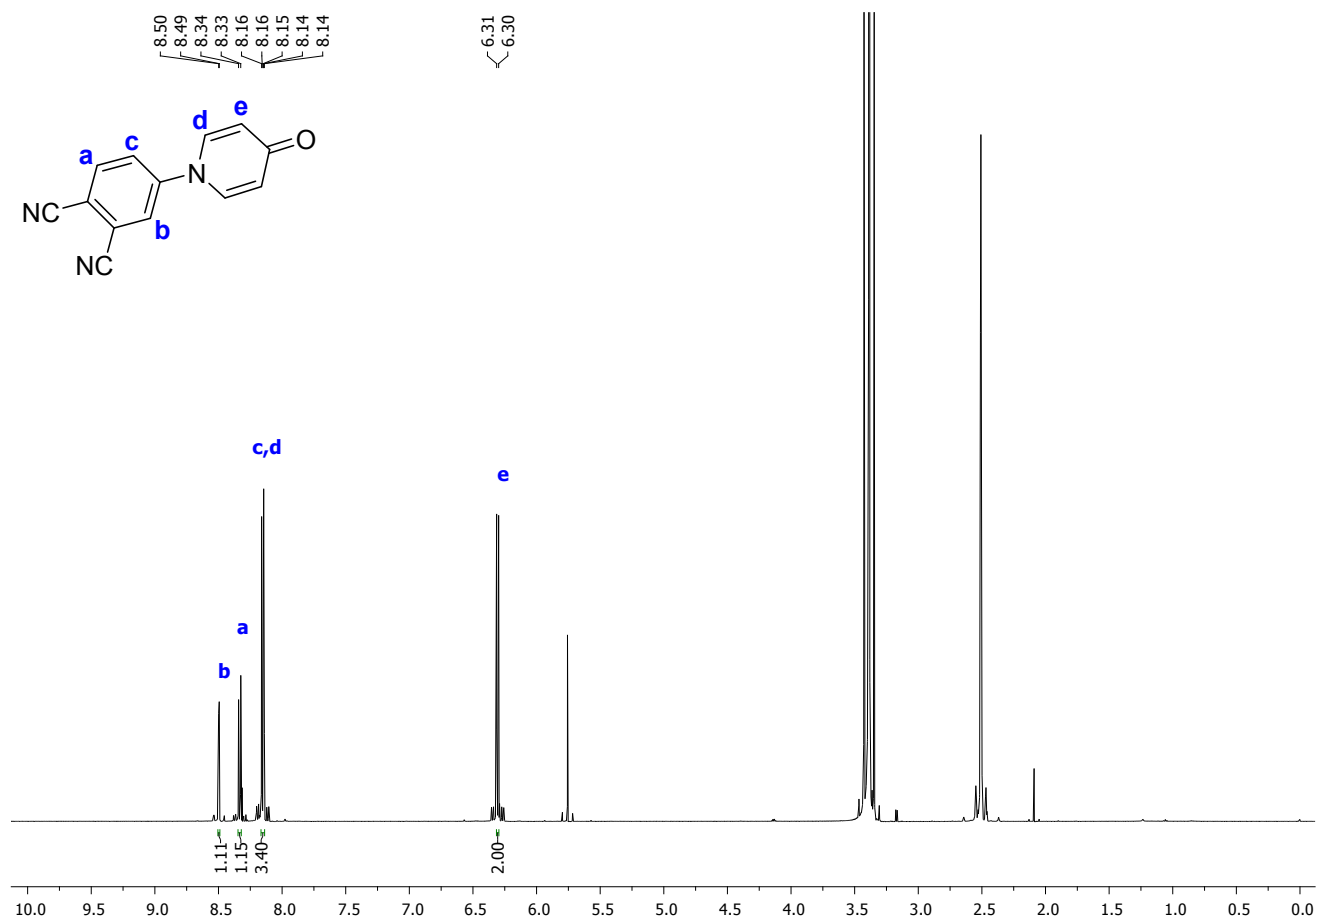

Figure SI 1 –  $^1\text{H}$  NMR spectrum of compound 1 in  $\text{DMSO-}d_6$ .

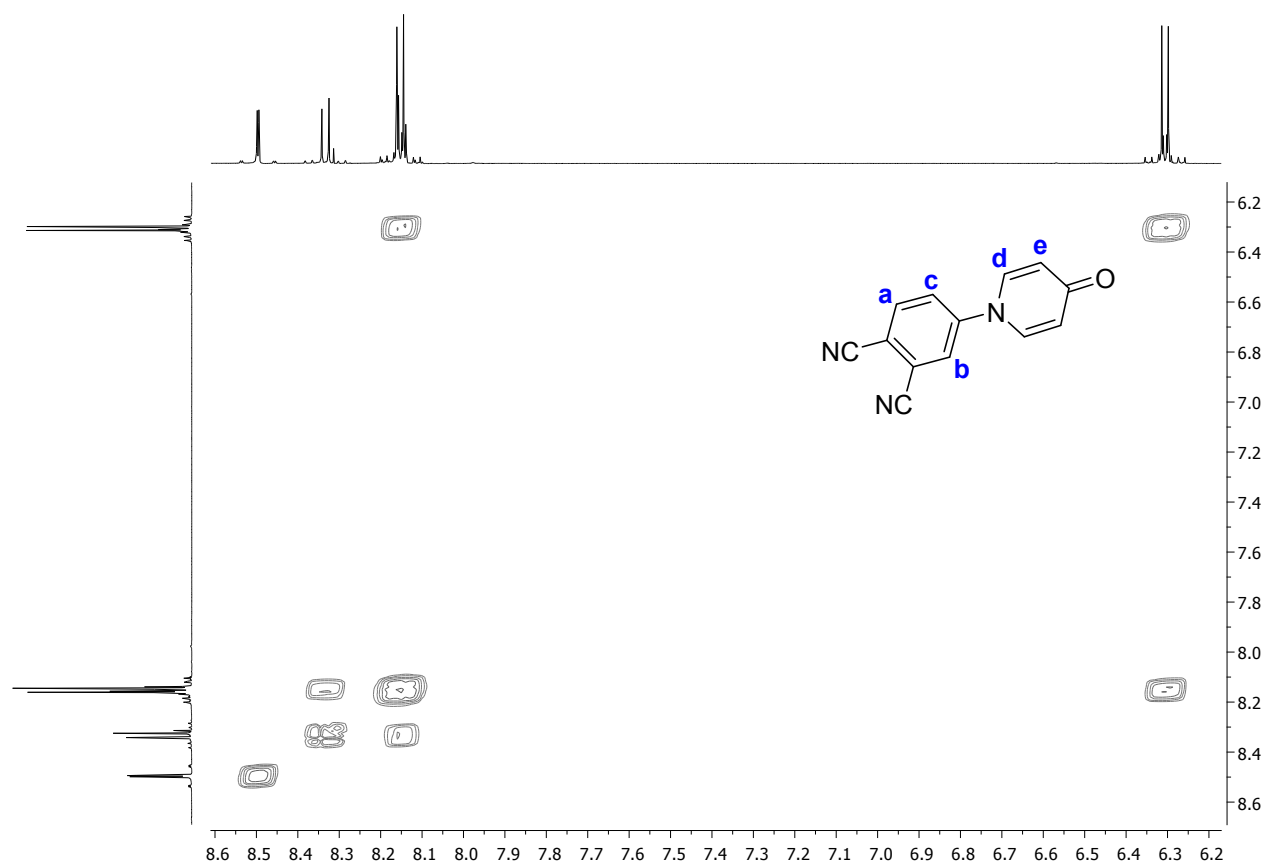

**Figure SI 2** – COSY 2D <sup>1</sup>H-<sup>1</sup>H NMR spectrum of compound **1** in DMSO-*d*<sub>6</sub>.

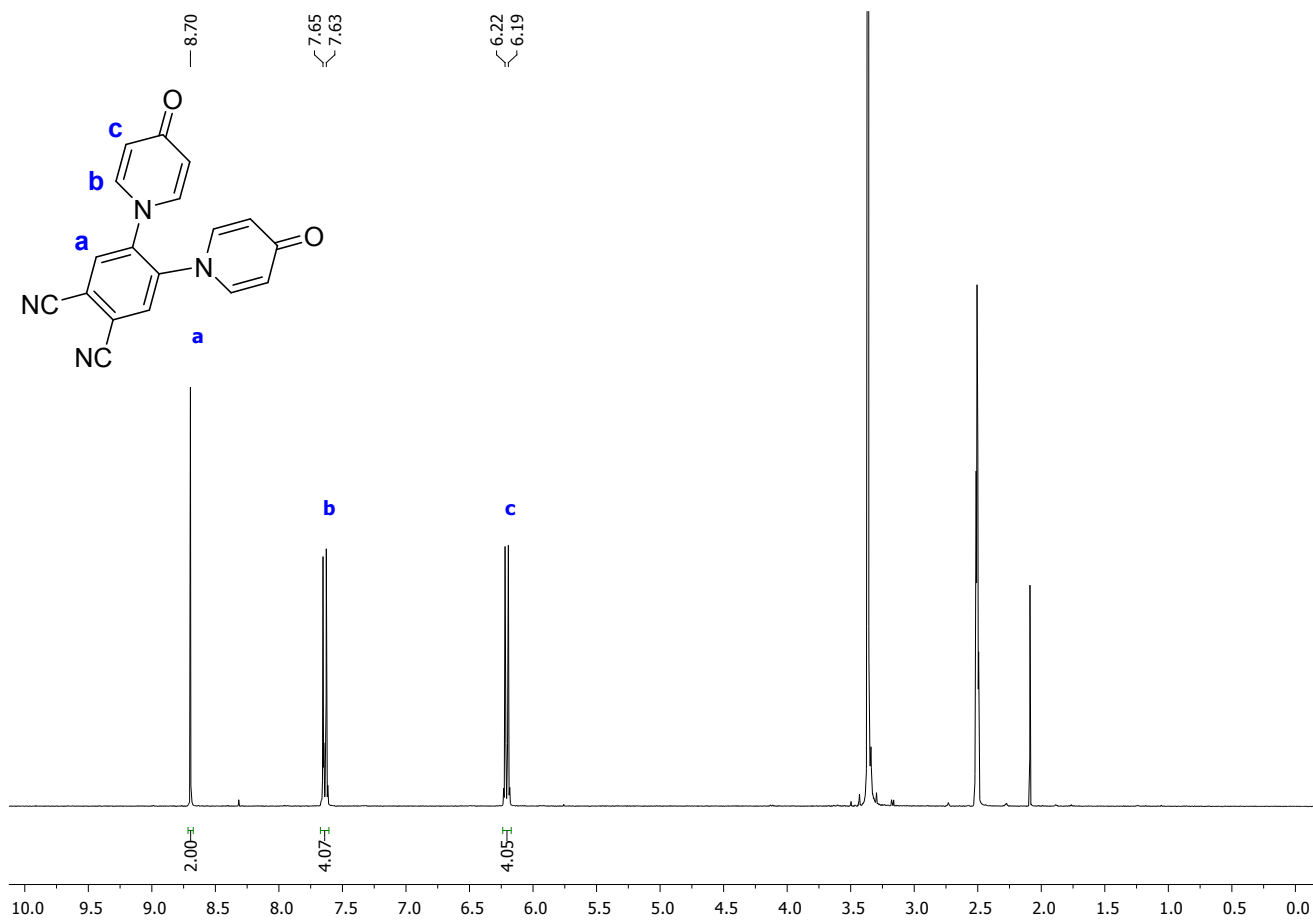

**Figure SI 3** –  $^1\text{H}$  NMR spectrum of compound **2** in  $\text{DMSO-}d_6$ .

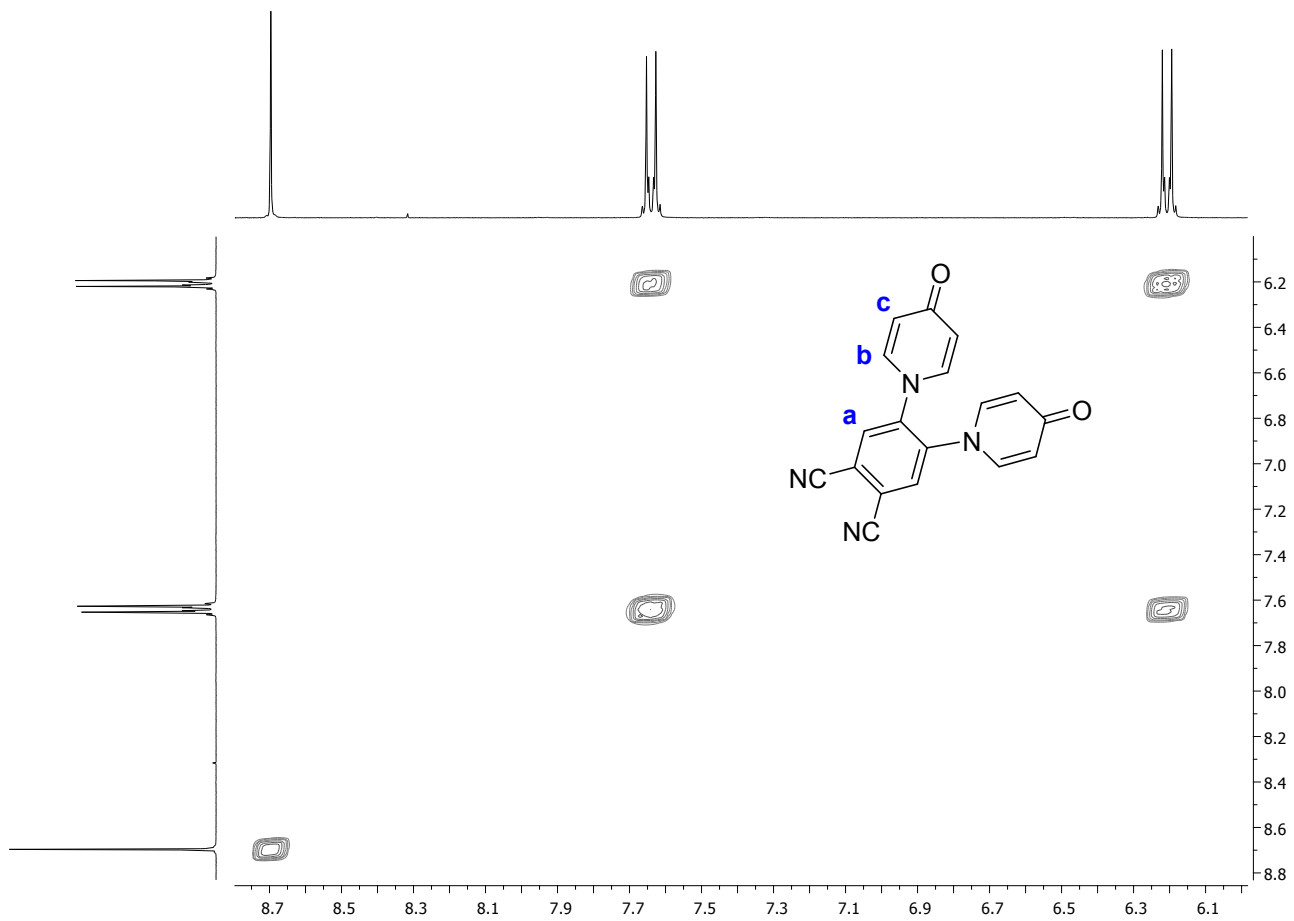

**Figure SI 4** – COSY 2D  $^1\text{H}$ - $^1\text{H}$  NMR spectrum of compound **2** in  $\text{DMSO-}d_6$ .

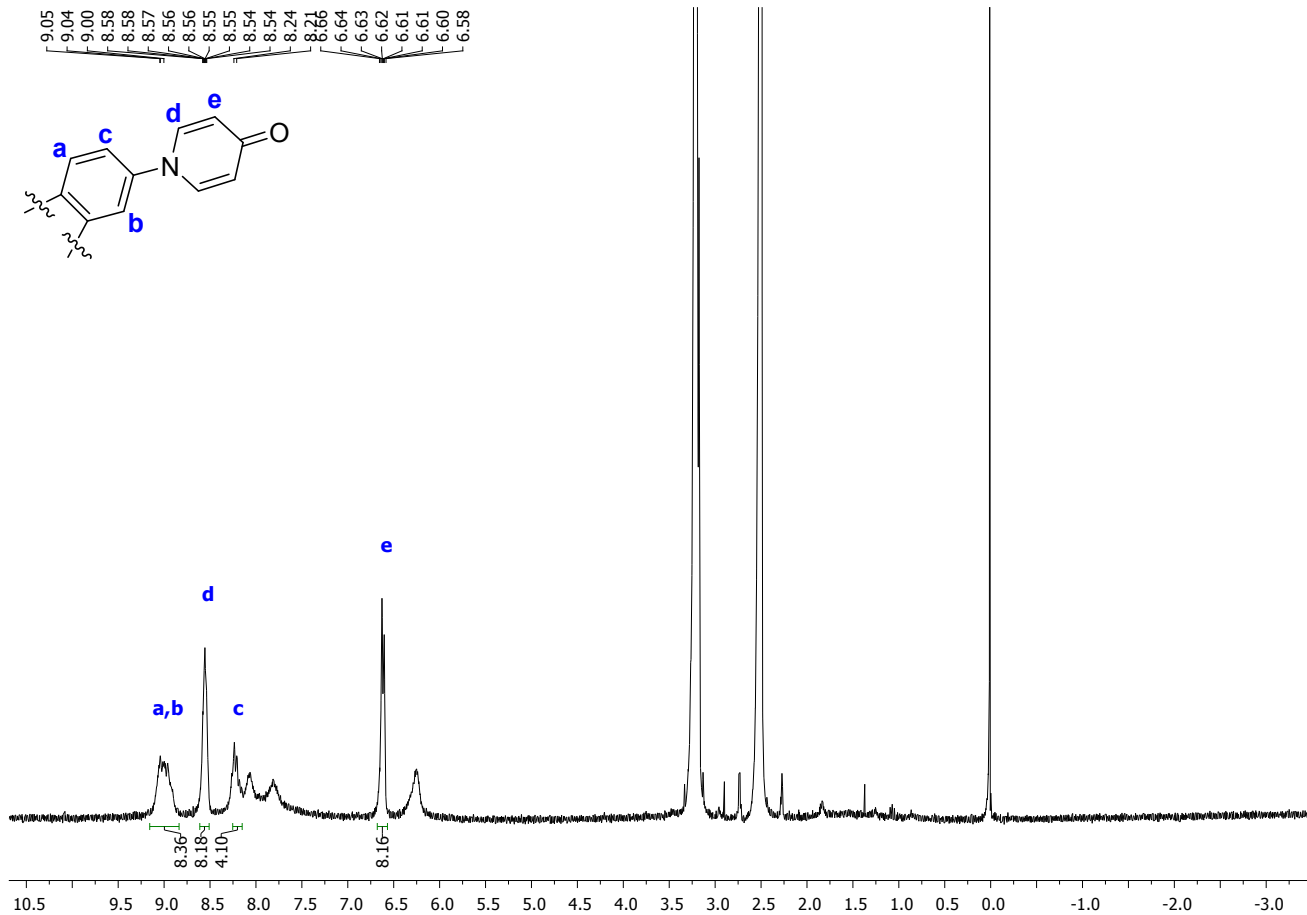

Figure SI 5 –  $^1\text{H}$  NMR spectrum of compound 3 in  $\text{DMSO-}d_6$ .

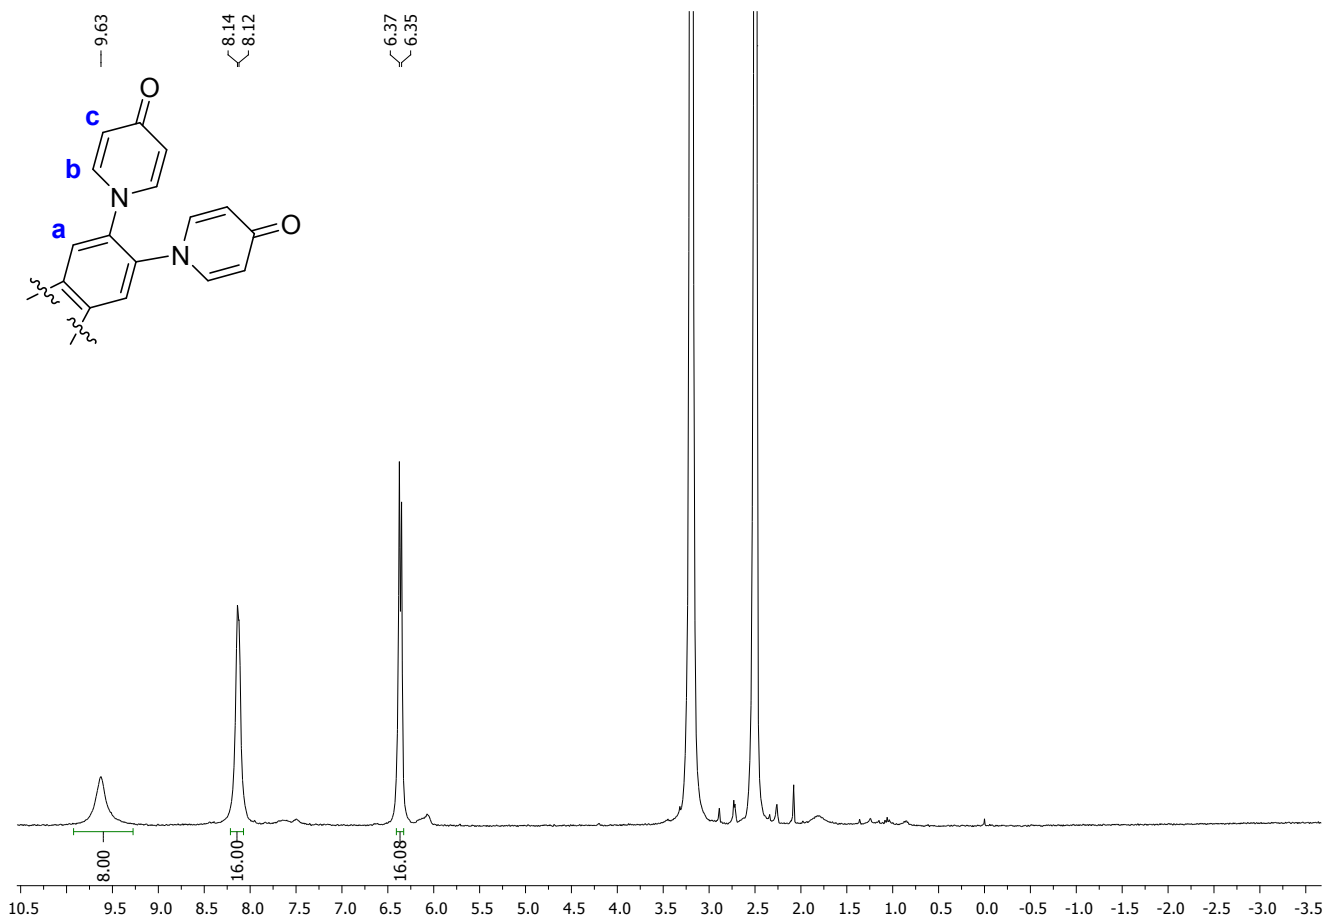

**Figure SI 6** –  $^1\text{H}$  NMR spectrum of compound 4 in  $\text{DMSO-}d_6$ .

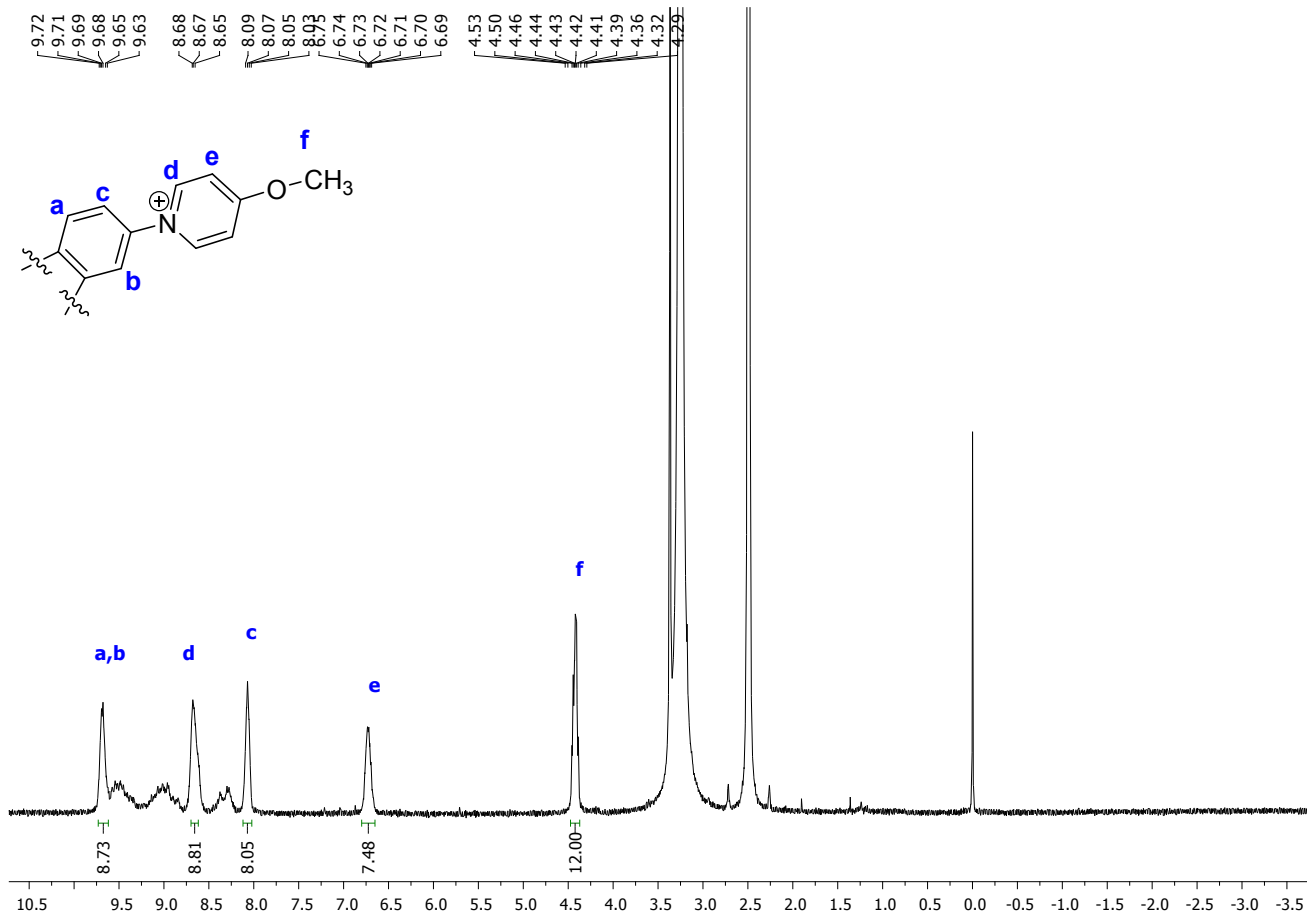

Figure SI 7 – <sup>1</sup>H NMR spectrum of compound 5 in DMSO-*d*<sub>6</sub>.



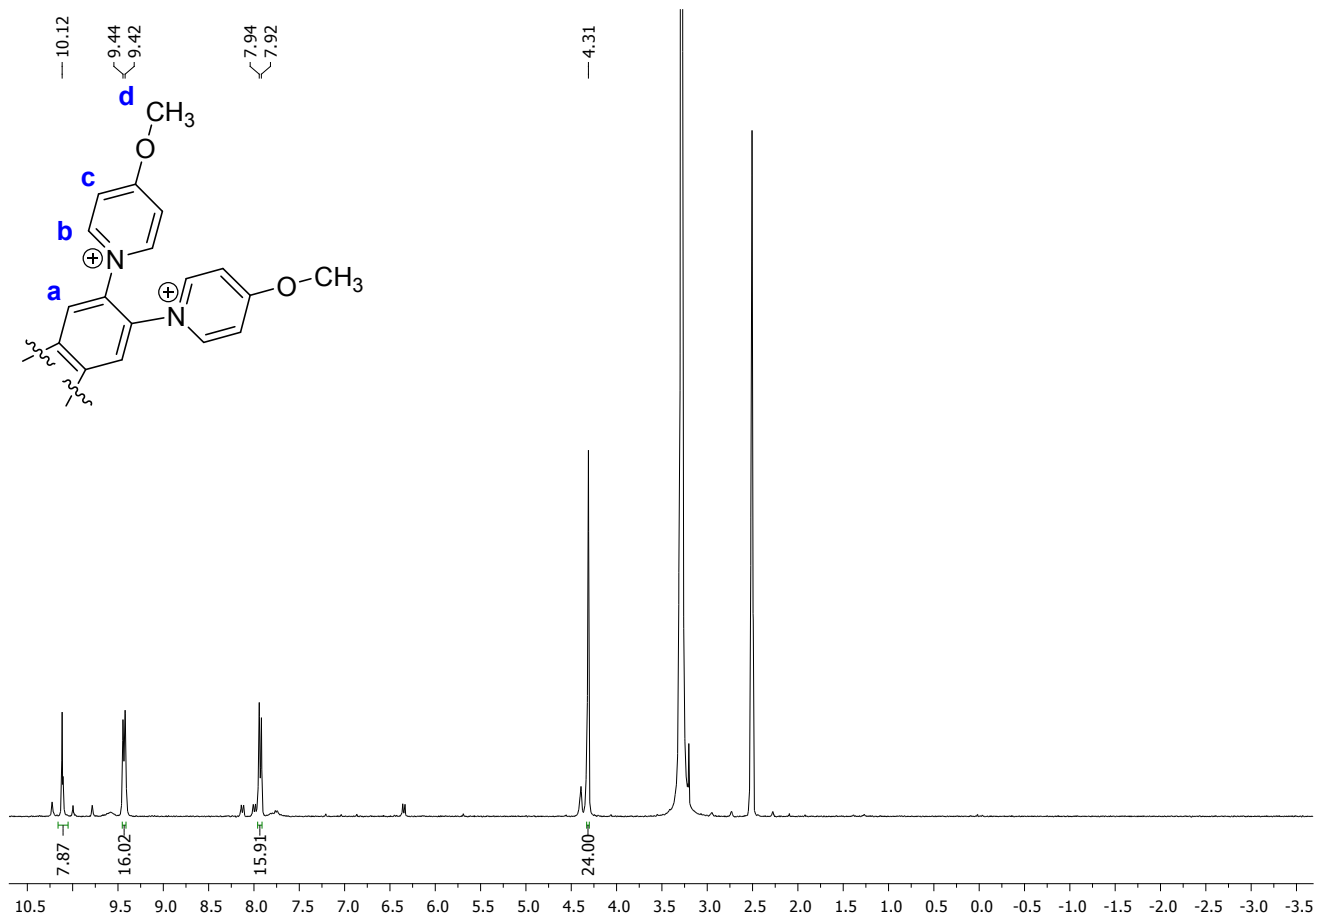

**Figure SI 8** –  $^1\text{H}$  NMR spectrum of compound **6** in  $\text{DMSO-}d_6$ .

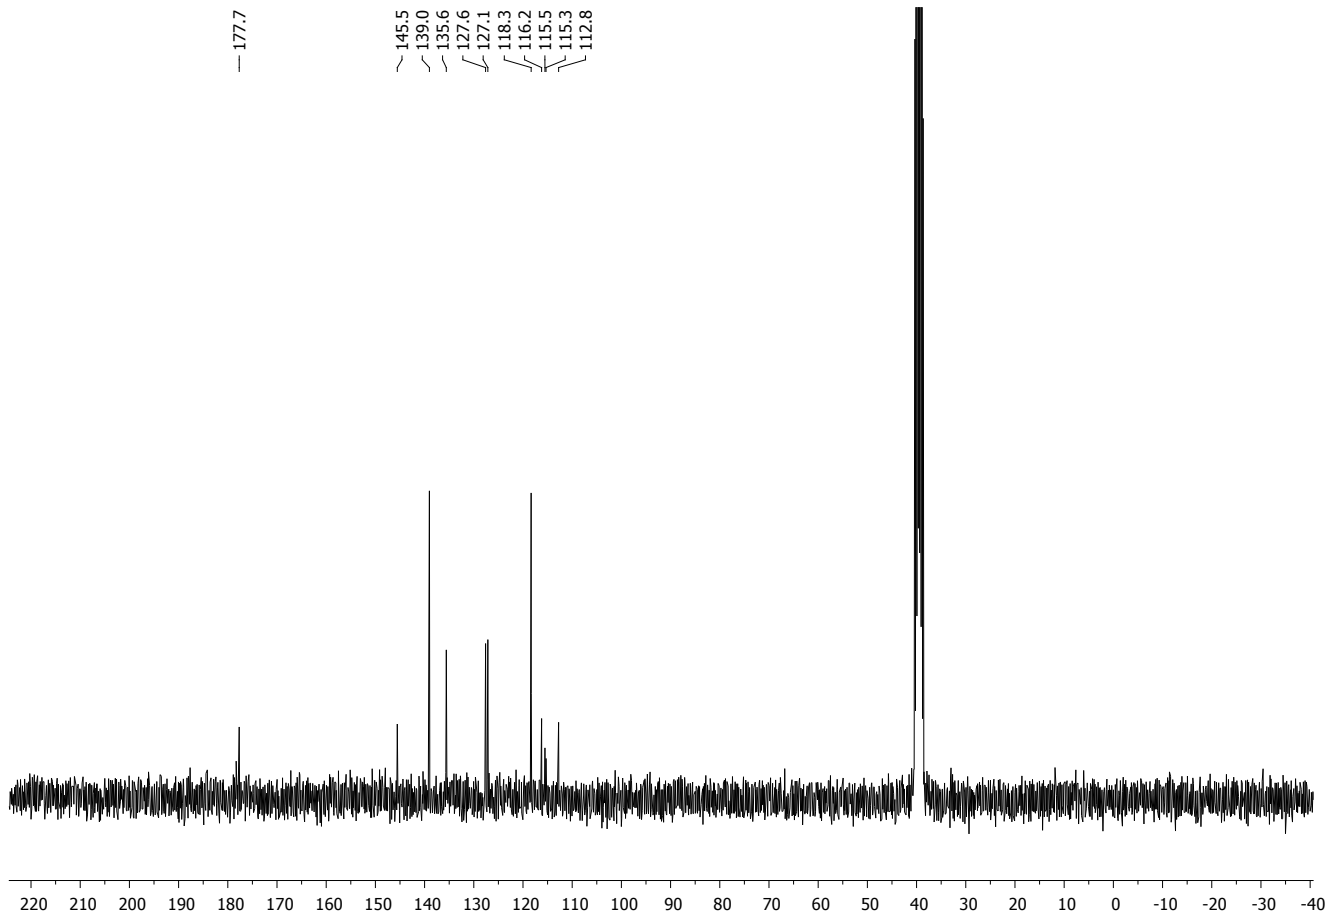

**Figure SI 9** –  $^{13}\text{C}$  NMR spectrum of compound **1** in  $\text{DMSO-}d_6$ .

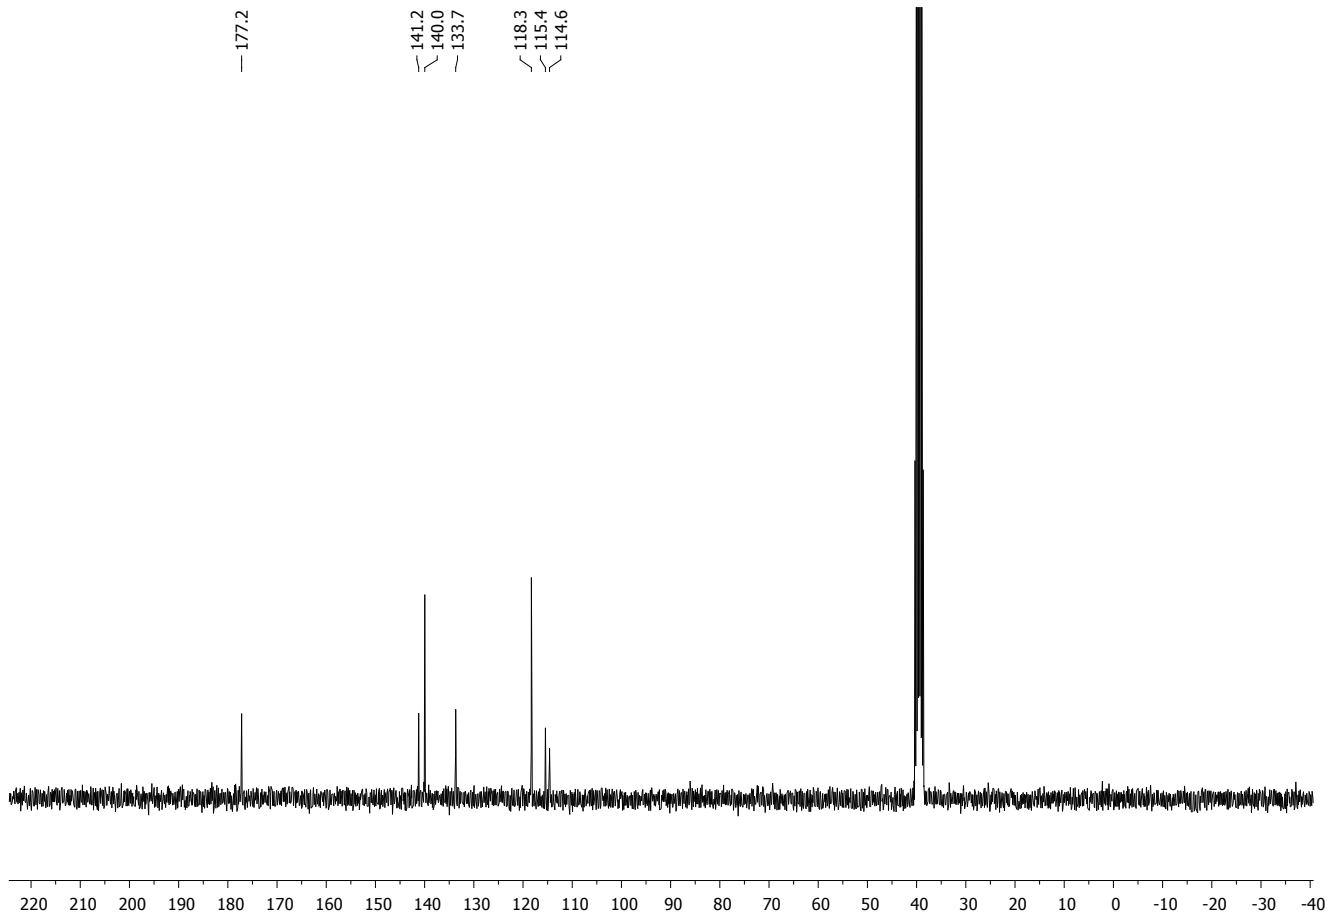

**Figure SI 10** –  $^{13}\text{C}$  NMR spectrum of compound **2** in  $\text{DMSO-}d_6$ .

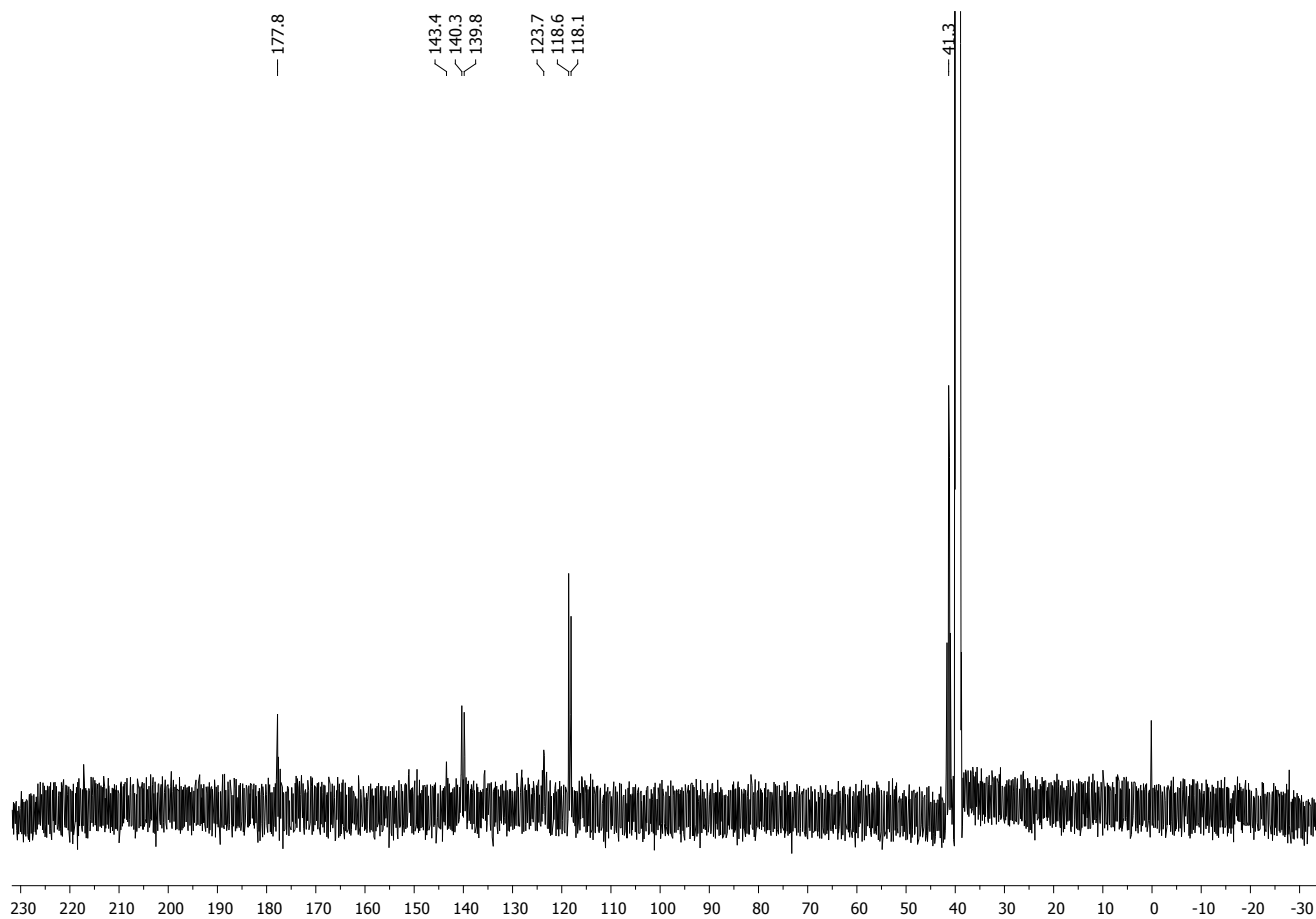

**Figure SI 11** –  $^{13}\text{C}$  NMR spectrum of compound **3** in  $\text{DMSO-}d_6$ .

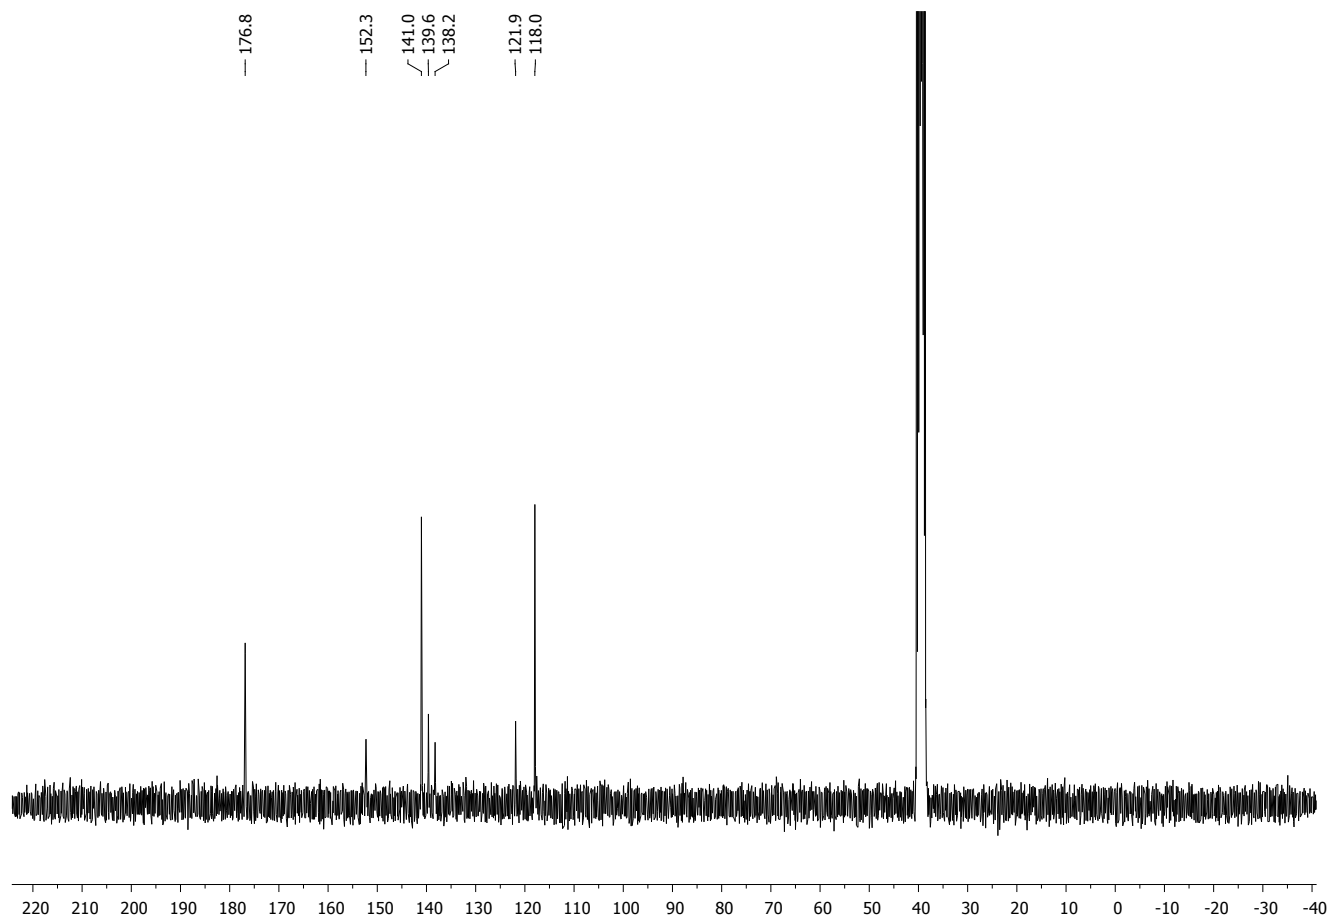

**Figure SI 12** –  $^{13}\text{C}$  NMR spectrum of compound **4** in  $\text{DMSO-}d_6$ .

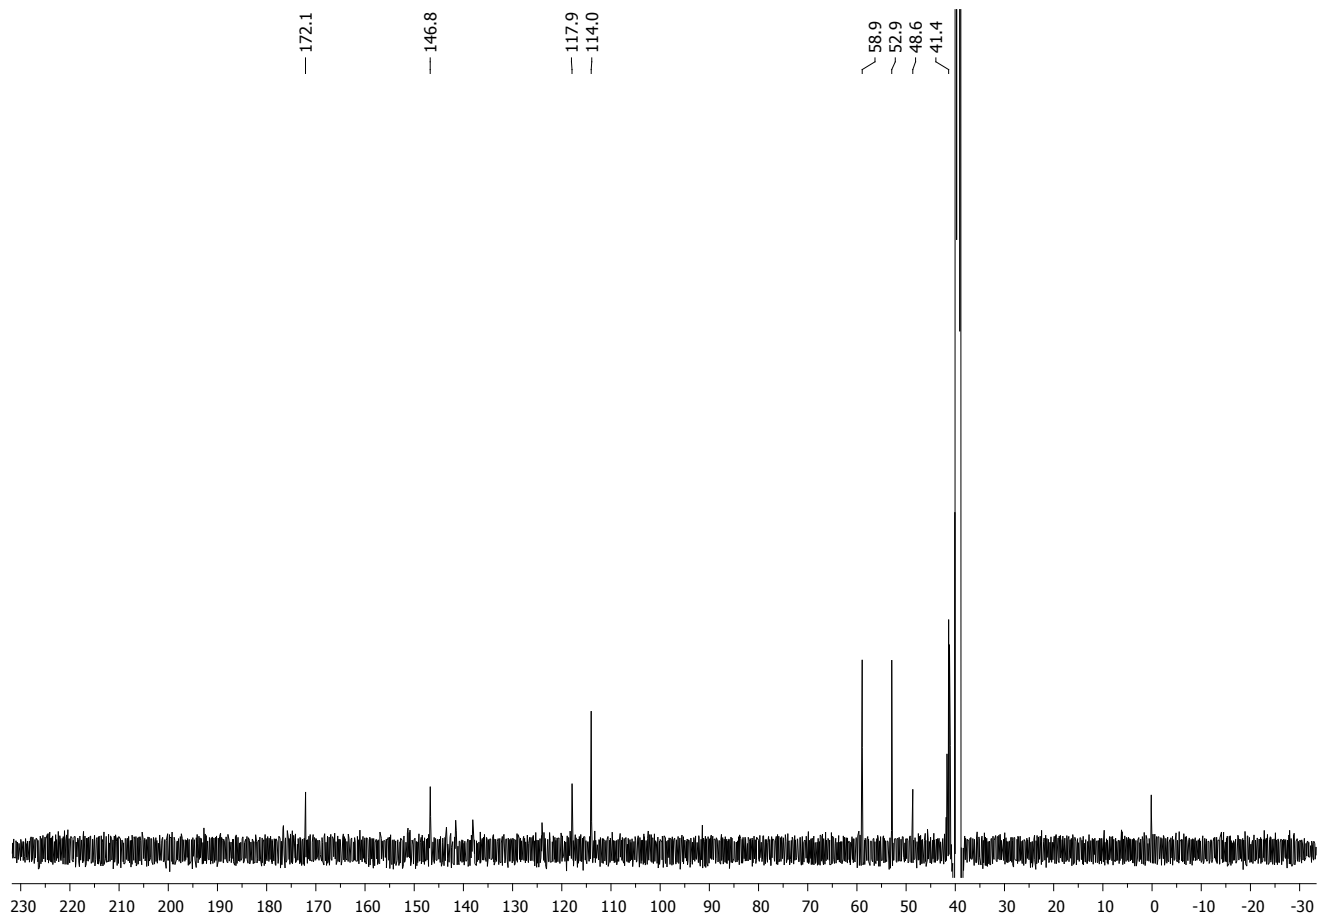

**Figure SI 13** –  $^{13}\text{C}$  NMR spectrum of compound **5** in  $\text{DMSO-}d_6$ .

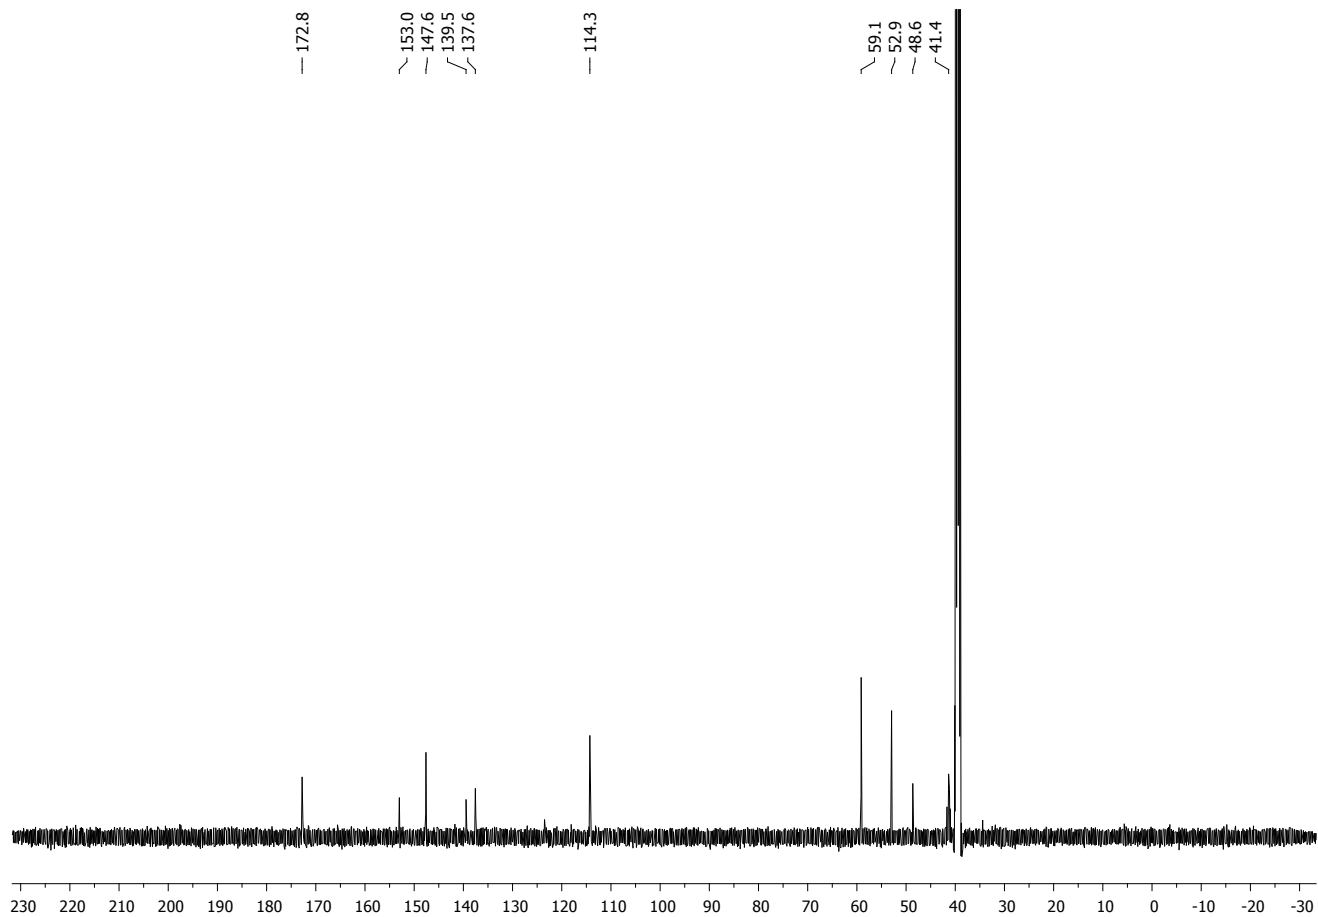

**Figure SI 14** –  $^{13}\text{C}$  NMR spectrum of compound **6** in  $\text{DMSO-}d_6$ .

## 1.2 Mass spectra of phthalonitrile and phthalocyanine derivatives

### 1.2.1 ESI-MS spectra

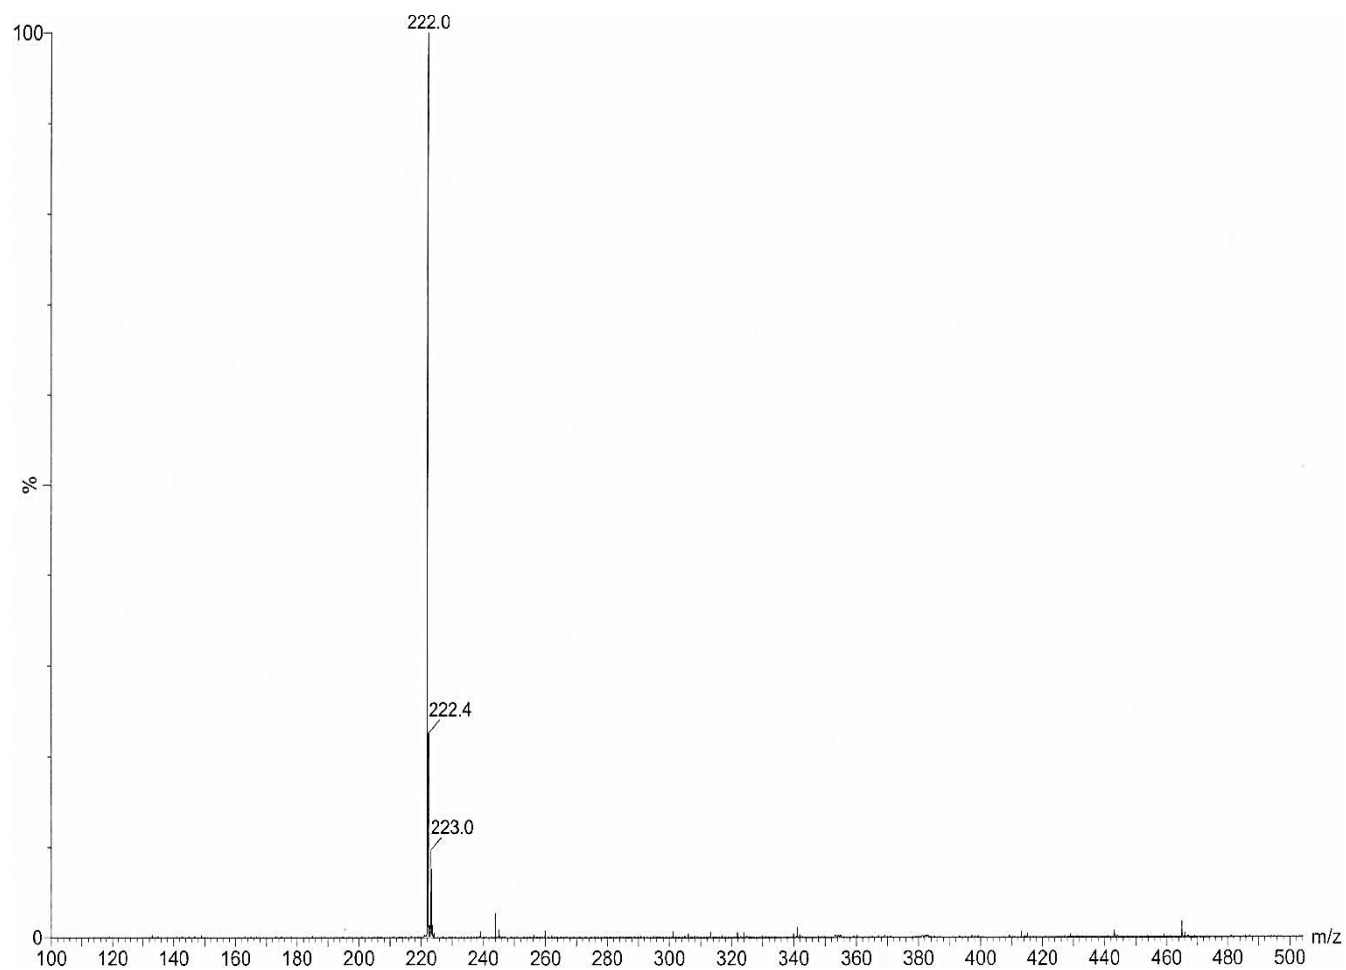

**Figure SI 15** – ESI-MS spectrum of compound **1**.



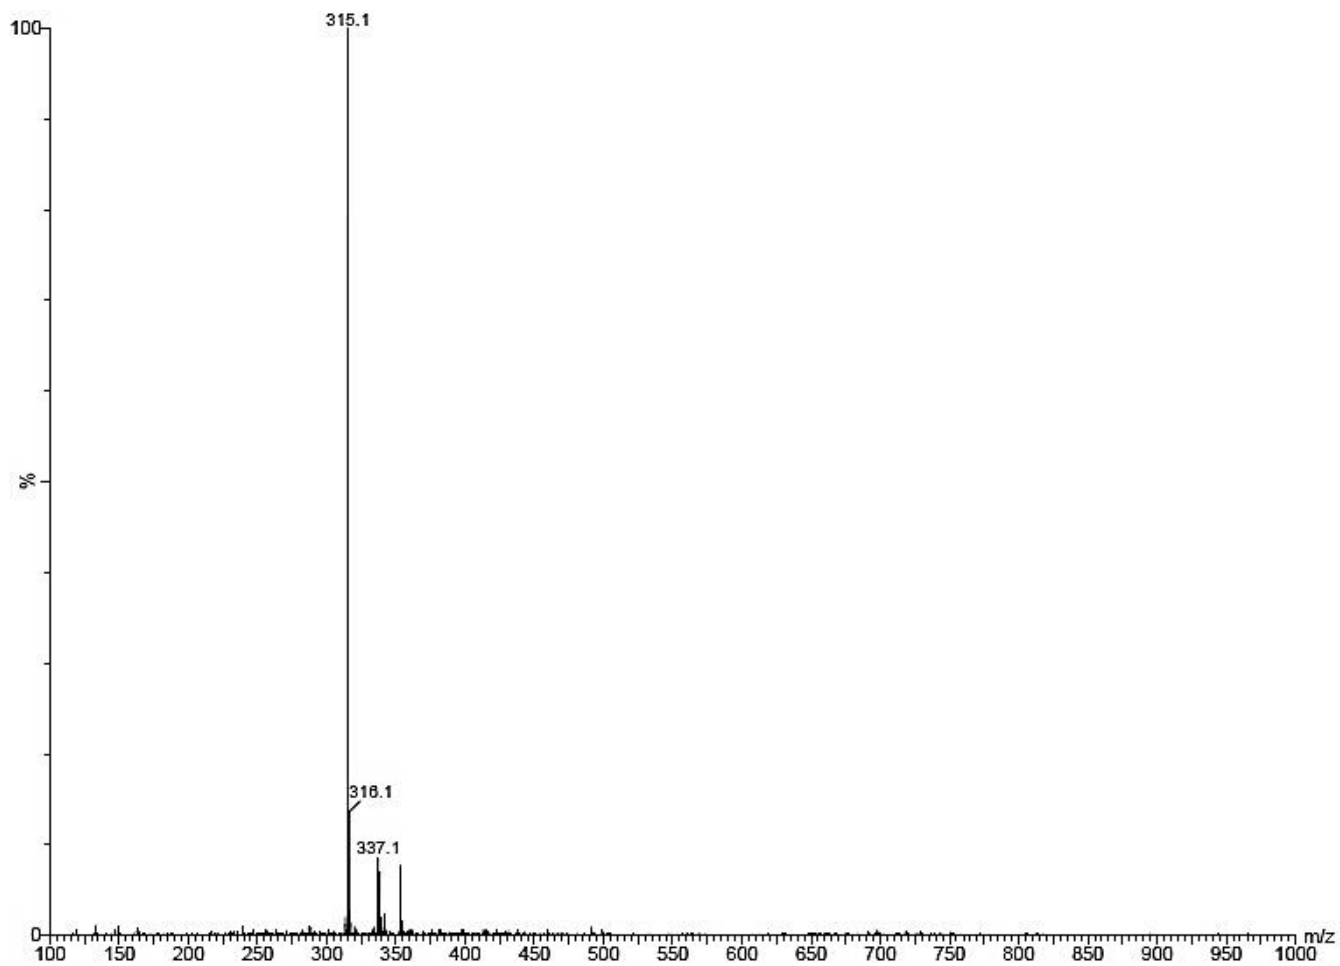

**Figure SI 16** – ESI-MS spectrum of compound **2**.

## 1.2.2 ESI-HRMS spectra

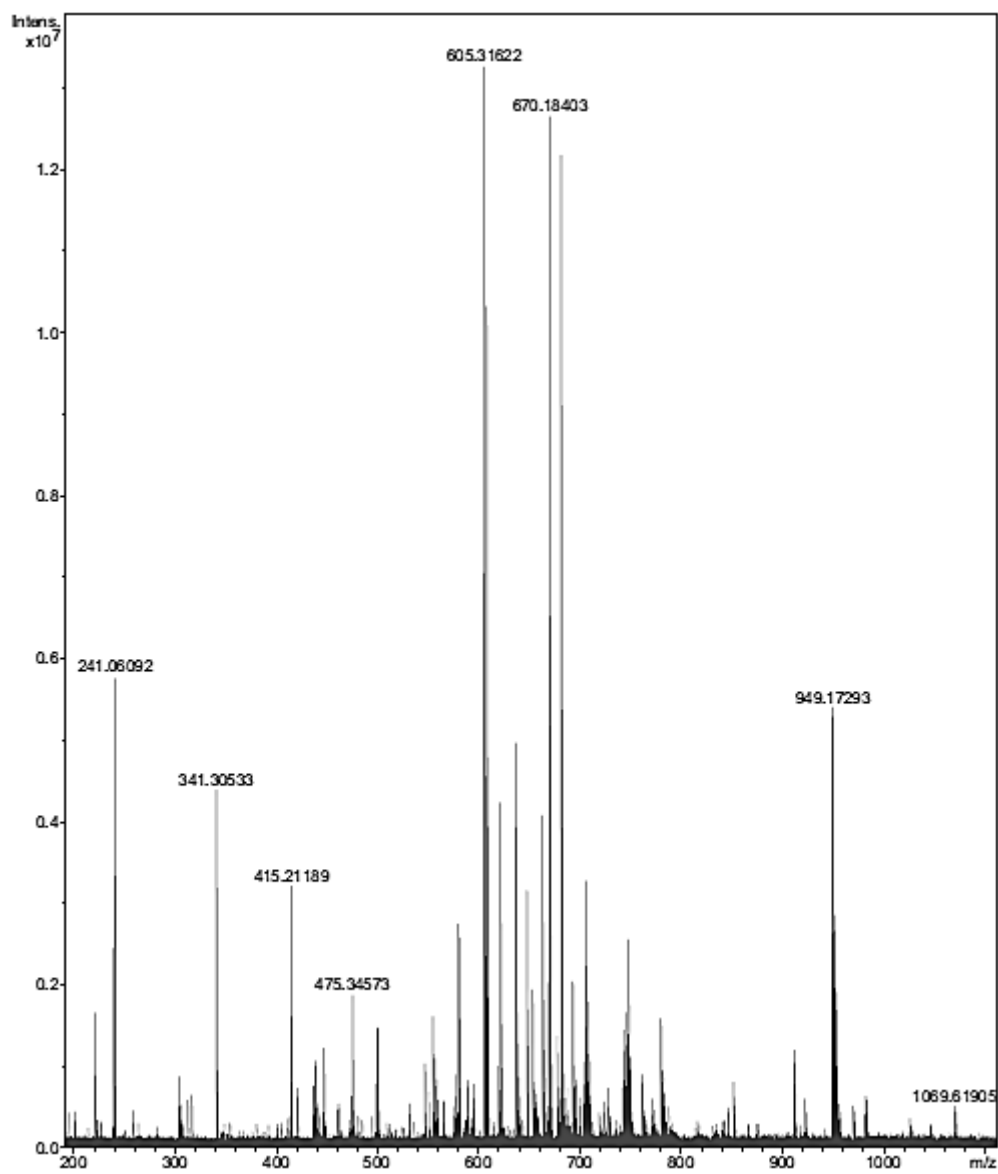

**Figure SI 17** – ESI-HRMS spectrum of compound **3**.

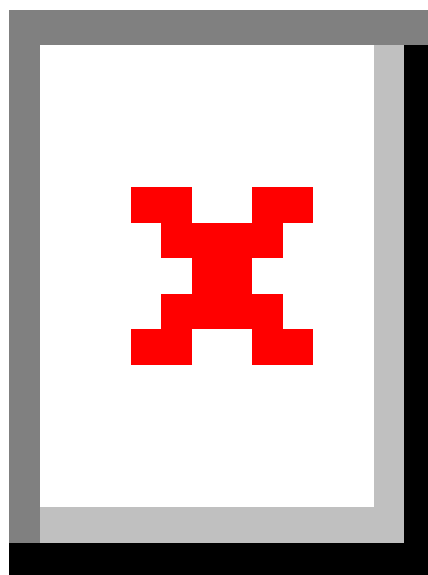

**Figure SI 18** – ESI-HRMS spectrum of compound 4.

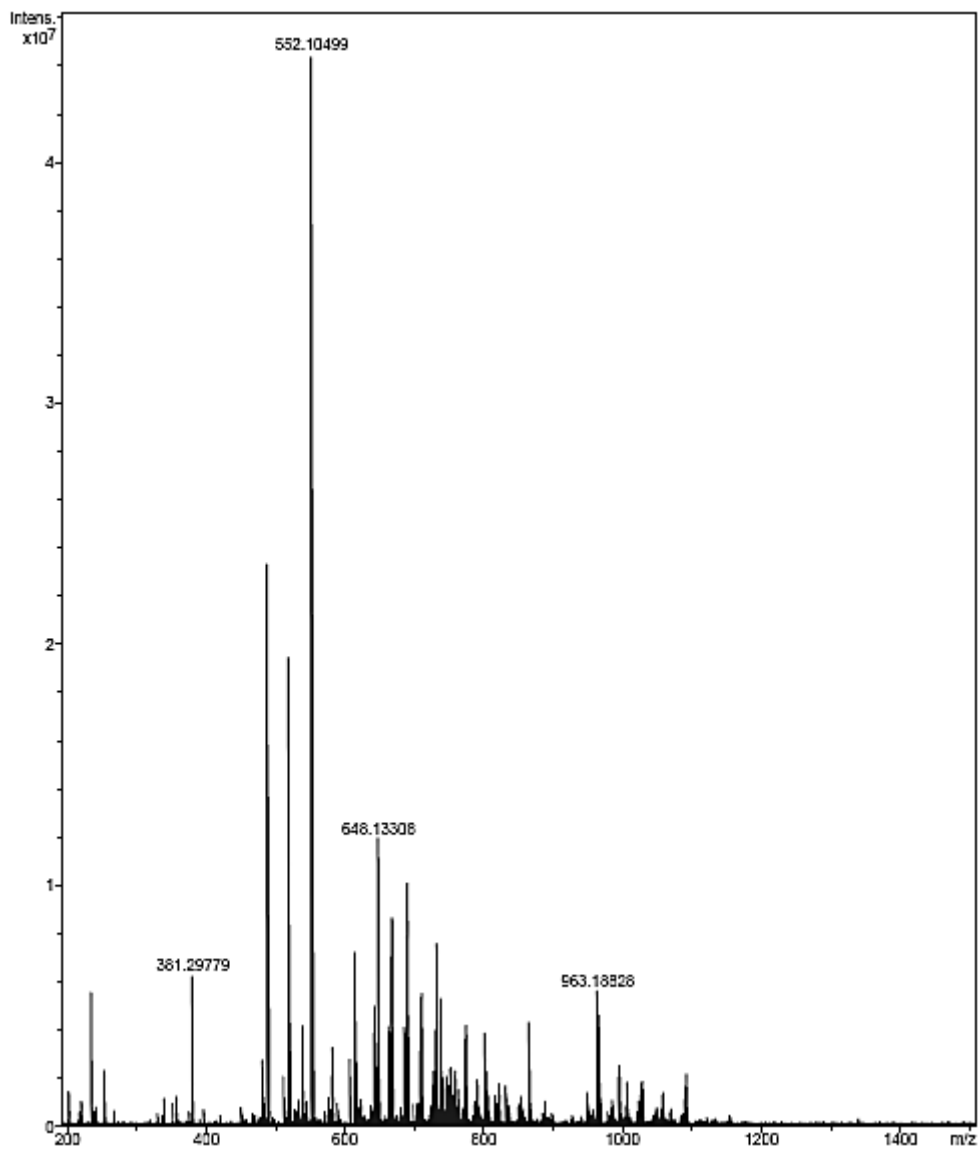

**Figure SI 19** – ESI-HRMS spectrum of compound **5**.

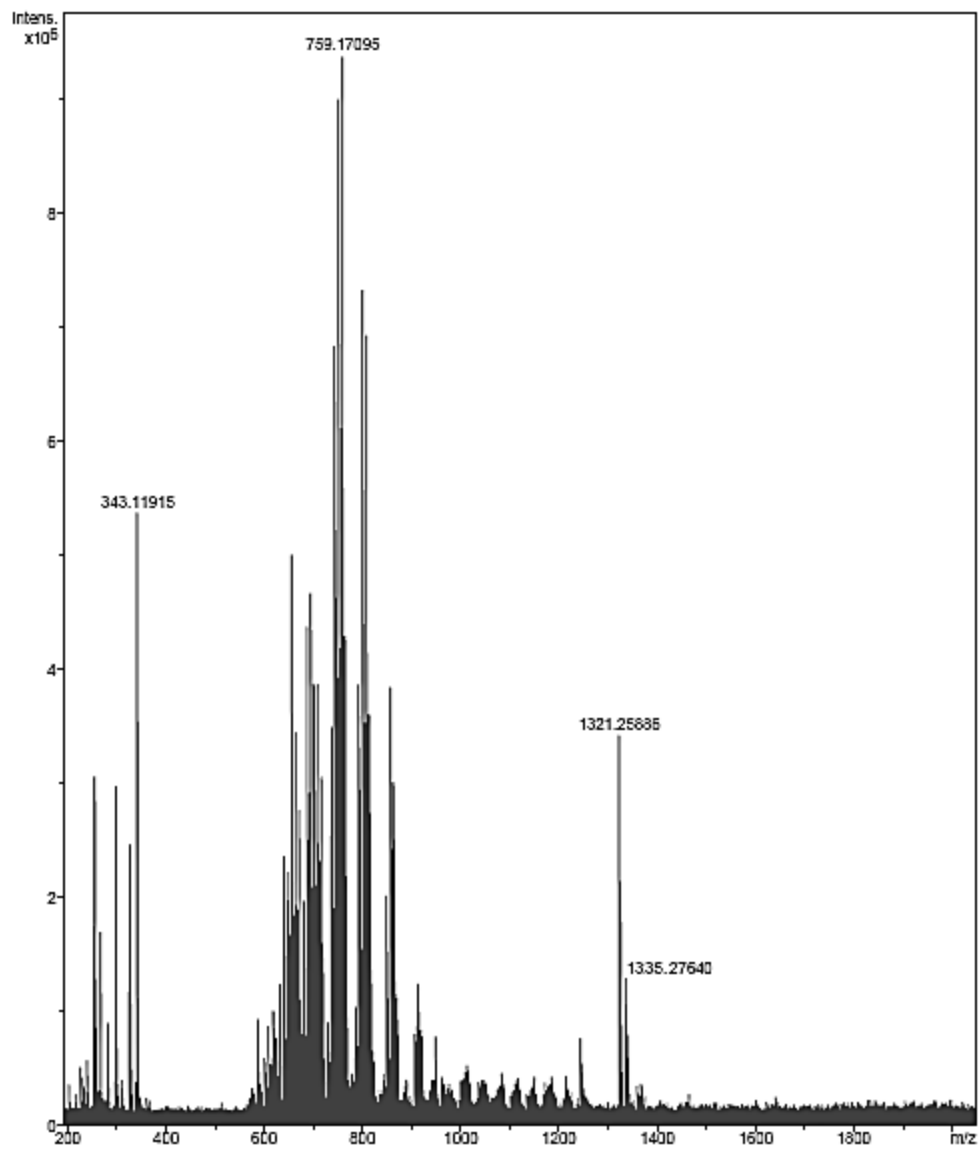

Figure SI 20 – ESI-HRMS spectrum of compound 6.

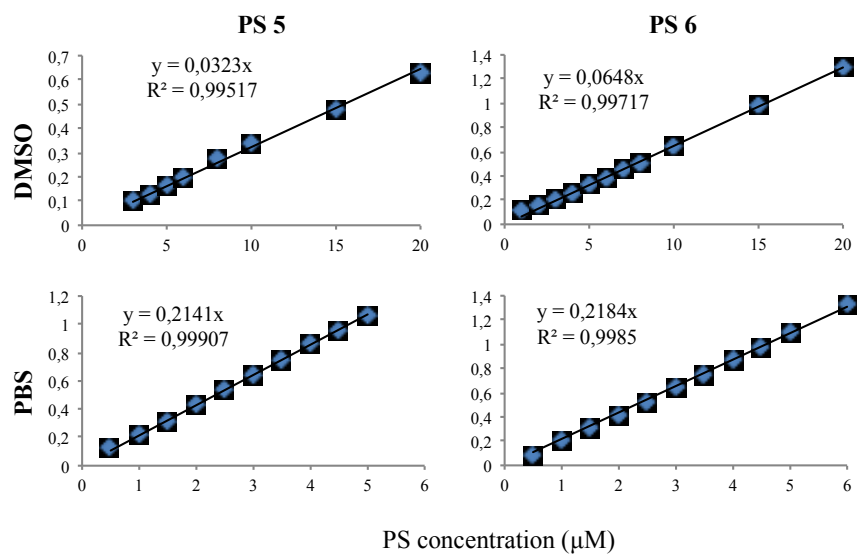

**Figure SI 21** – Linear regression graphics of Pcs **5** and **6** plotted the Q-band absorbance *versus* the concentrations in PBS and DMSO.

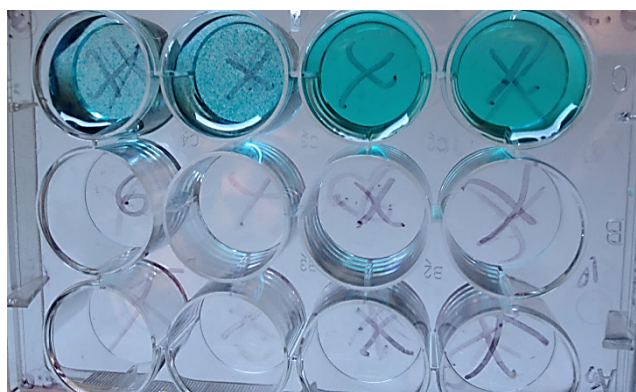

**Figure SI 22** – 12-well plate prepared for PDI studies with 20  $\mu\text{M}$  of **5**, two left wells, and **6**, two right wells, after 15 min of pre-incubation in the dark, under gentle shaking conditions.
